# Supplementary material for: Development of a more penetrating HER2-positive Breast Cancer Tumor Model and Testing Efficacy of SHP2 Targeting with an Active-Site Inhibitor
Source: Research Square preprint supplement (doi:10.21203/rs.3.rs-8196938/v1), 2025-12-05
Supplement: Supplementary file 1 [file 68efa222fe04f60ab4a641c3.docx]

**Supplementary Figure 1:** Images of exposed tumors from two euthanized mice showing lobulation and high vascularization.

**Supplementary Table 1**: Shows dosage groups, number of mice in each group, and the observed symptoms in a timeframe of 24 hours. The results are entered as no symptom since there was no difference in movement activities, eating, drinking, and general demeanor between the placebo and the test groups.

| **Placebo** | **10 mg/kg** | **20 mg/kg** | **50 mg/kg** | **100 mg/kg** | **200 mg/kg** |
| --- | --- | --- | --- | --- | --- |
| 3 mice | 3 mice | 3 mice | 3 mice | 3 mice | 3 mice |
| No symptom | No symptom | No symptom | No symptom | No symptom | No symptom |
